# Supplementary material for: Preventive&nbsp;Antibiotic&nbsp;Treatment&nbsp;Increases&nbsp;Susceptibility&nbsp;of&nbsp;Neonatal&nbsp;chicks&nbsp;to&nbsp;Salmonella&nbsp;Infection&nbsp;via&nbsp;Disrupting&nbsp;Gut&nbsp;Microbiota&nbsp;and&nbsp;Linoleic&nbsp;Acid&nbsp;Metabolis
Source: Research Square preprint supplement (doi:10.21203/rs.3.rs-101170/v1), 2020-11-05
Supplement: Supplementary file 2 [file 9d6452b562e6034f9e926d2f.docx]

| **Table S1** Primers used for bacterial and host qPCR | | |
| --- | --- | --- |
| **Bacterial 16S or 23S**  **rRNA target** | **Primer** | **Sequence (5'-3')** |
| *Eubacteria* (total bacteria) | Forward | ACTCCTACGGGAGGCAGCAGT |
| Reverse | ATTACCGCGGCTGCTGGC |
| *Lactobacillus* | Forward | AGCAGTAGGGAATCTTCCA |
| Reverse | CACCGCTACACATGGAG |
| *Bacteroidetes* | Forward | GGARCATGTGGTTTAATTCGATGAT |
| Reverse | AGCTGACGACAACCATGCAG |
| *Enterobacteriaceae* | Forward | TGCCGTAACTTCGGGAGAAGGCA |
| Reverse | TCAAGGCTCAATGTTCAGTGTC |
| *Clostridium butyricum* | Forward | GTGCCGCCGCTAACGCATTAAGTAT |
| Reverse | ACCATGCACCACCTGTCTTCCTGCC |
| *Faecalibacterium prausnitzii* | Forward | GATGGCCTCGCGTCCGATTAG |
| Reverse | CCGAAGACCTTCTTCCTCC |
|  |  |  |
| **Host gene target** | **Primer** | **Sequence (5'-3')** |
| *ZO-1* | Forward | GCCTGAATCAAACCCAGCAA |
| Reverse | TATGCGGCGGTAAGGATGAT |
| *Occludin* | Forward | GATGGACAGCATCAACGACC |
| Reverse | CATGCGCTTGATGTGGAAGA |
| *Claudin 3* | Forward | GAAGGGCTGTGGATGAACTG |
| Reverse | GAGACGATGGTGATCTTGGC |
| *MUC2* | Forward | AATGCTGAGTTCTTGCCTAA |
| Reverse | GTTGCAGTTCATATCCTGGT |
| *TFF2* | Forward | CCCTGCTGATCCTCGTAT |
| Reverse | GCTGTTATTTCCCAGTTGA |
| *IL-22* | Forward | CAGGAATCGCACCTACACCT |
| Reverse | TCATGTAGCAGCGGTTGTTC |
| *IL-17A* | Forward | CCATTCCAGGTGCGTGAACT |
| Reverse | TTTCTTCTCCAGGCGGTACG |
| *IFN-α* | Forward | CCAGCACCTCGAGCAAT |
| Reverse | GGCGCTGTAATCGTTGTCT |
| *CYP1A2* | Forward | ATCTTTGGAGCAGGCTTTGA |
| Reverse | CGCTCTCCTGAATCTTCTTCTG |
| *EPHX2* | Forward | TCTCCAGCAAGAAGAACCATTG |
| Reverse | AACACGGAAGCCAGCATCA |
| *GAPDH* | Forward | TCTCTGGCAAAGTCCAAGTG |
| Reverse | CTTGAAGTGTCCGTGTGTAGAA |
